# Supplementary material for: Insights into (Mn/Fe/Co)M–N–C dual-atom catalysts for the oxygen reduction reaction: the critical role of structural evolution
Source: Royal Society of Chemistry journal article supplement (doi:10.1039/d4nj03924f), 2024-01-01
Supplement: d4nj03924f1.pdf [file d4nj03924f1.pdf]

## Supporting information

# Insights into (Mn/Fe/Co)M-N-C Dual-Atom Catalysts for the Oxygen Reduction Reaction: The Critical Role of Structural Evolution

Xiaoming Zhang<sup>a,b,c</sup>, Suli Wang<sup>a,c\*</sup>, Zhangxun Xia<sup>a,c</sup>, Huanqiao Li<sup>a,c</sup>,  
Shansheng Yu<sup>d</sup> and Gongquan Sun<sup>a,c\*</sup>

<sup>1</sup>Division of Fuel Cells and Battery, Dalian National Laboratory for Clean Energy, Dalian Institute of Chemical Physics, Chinese Academy of Sciences, Dalian 116023, China

<sup>2</sup>Center of Materials Science and Optoelectronics Engineering, University of Chinese Academy of Sciences, Beijing 100049, China

<sup>3</sup>Key Laboratory of Fuel Cells & Hybrid Power Sources, Chinese Academy of Sciences, Dalian 116023, China

<sup>4</sup>Department of Materials Science, Jilin University, Changchun 130012, China

Keywords: diatomic catalyst, DFT, ORR, activity and stability

\*Corresponding author: Suli Wang, e-mail: [suliwang@dicp.ac.cn](mailto:suliwang@dicp.ac.cn) & Gongquan Sun, e-mail: [gqsun@dicp.ac.cn](mailto:gqsun@dicp.ac.cn)

## Figures and Tables

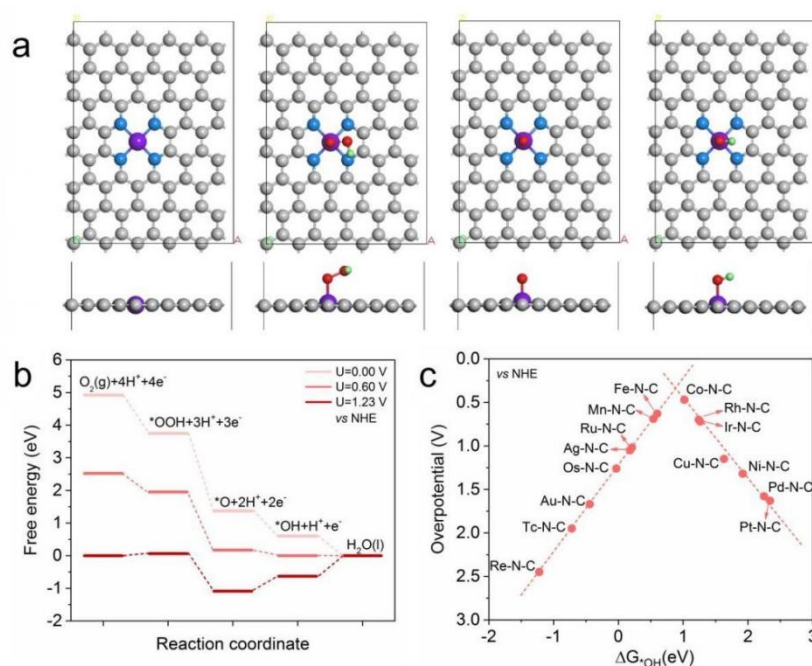

Figure S 1. (a) The optimized geometry structures of Fe-N-C, \*OOH-Fe-N-C, \*O-Fe-N-C, and \*OH-Fe-N-C. (b) The ORR free energy diagram of Fe-N-C. (c) The volcano plot between overpotential and  $\Delta G^*_{OH}$  of M-N-C. Gray: C; Purple: Fe; Blue: N; Red: O; Green: H.

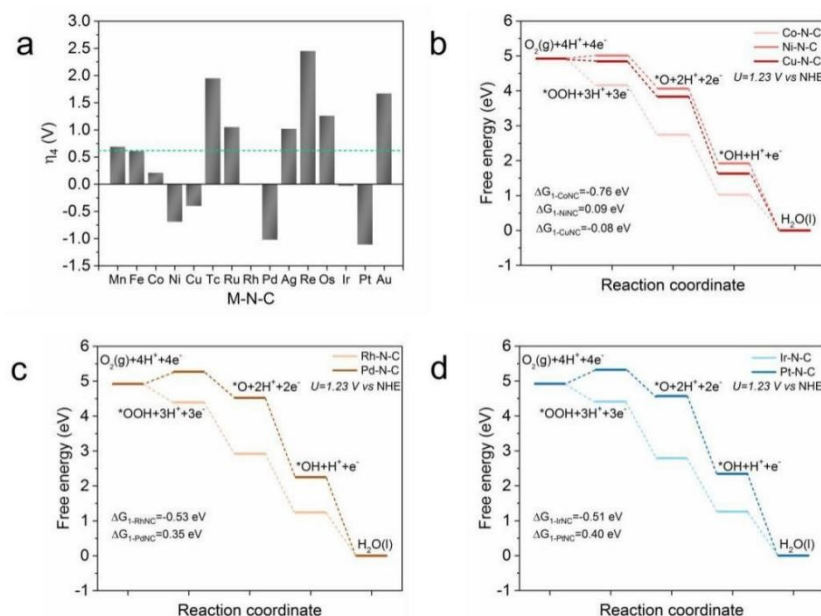

Figure S 2. (a) The overpotential of step  $*OH+H^++e^- \rightarrow H_2O(l)$  for M-N-C. The ORR free energy diagram of (b) Co/Ni/Cu-N-C, (c) Rh/Pd-N-C and (d) Ir/Pt-N-C.

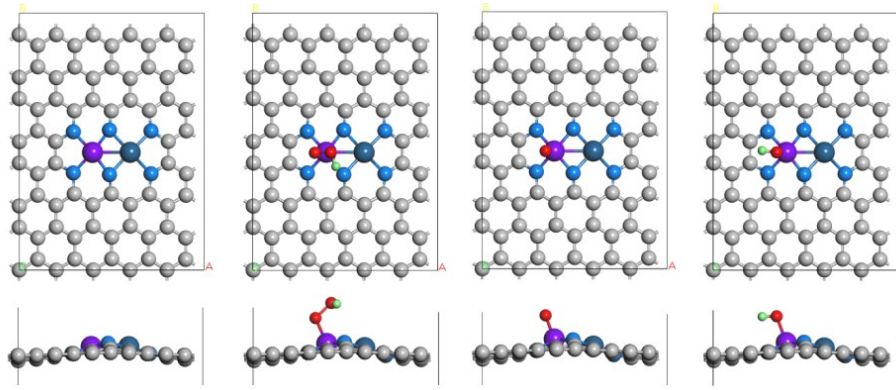

Figure S 3. The optimized structures FePt-N-C, \*OOH-FePt-N-C, \*O-FePt-N-C and \*OH-FePt-N-C. Gray: C; Purple: Fe; Dark blue: Pt; Blue: N; Red: O; Green: H.

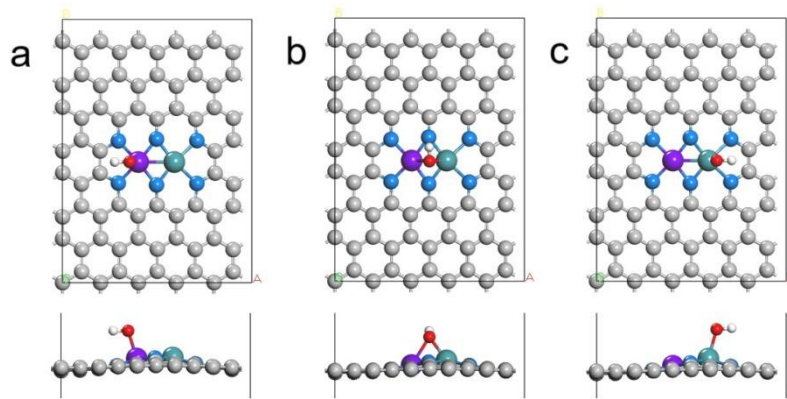

Figure S 4. The optimised adsorption structures of OH on Fe, M and the bridge site

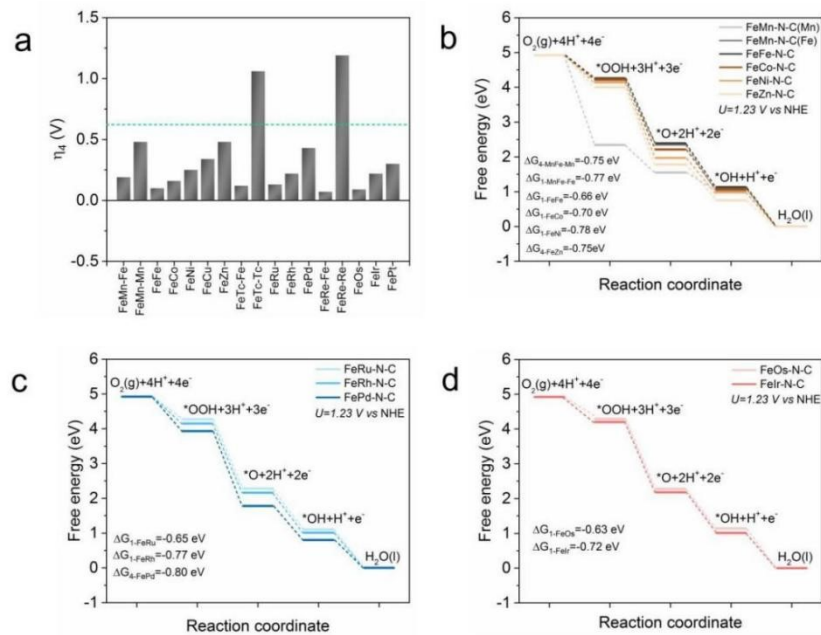

Figure S 5. (a) The overpotential of step  $^*\text{OH}+\text{H}^++\text{e}^-\rightarrow\text{H}_2\text{O}(\text{l})$  for FeM-N-C. The ORR free energy diagram of (b) FeM-N-C (M=Mn, Fe, Co, Ni, Zn), (c) FeM-N-C (M=Ru, Rh, Pd) and (d) FeM-N-C (M=Os, Ir).

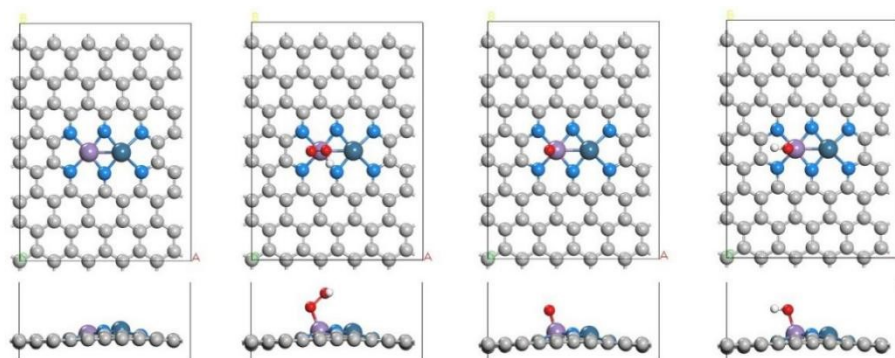

Figure S 6. The optimized structures MnCo-N-C,  $^*\text{OOH-MnCo-N-C}$ ,  $^*\text{O-MnCo-N-C}$  and  $^*\text{OH-MnCo-N-C}$ . Gray: C; Purple: Mn; Cyan: Co; Blue: N; Red: O; White: H.

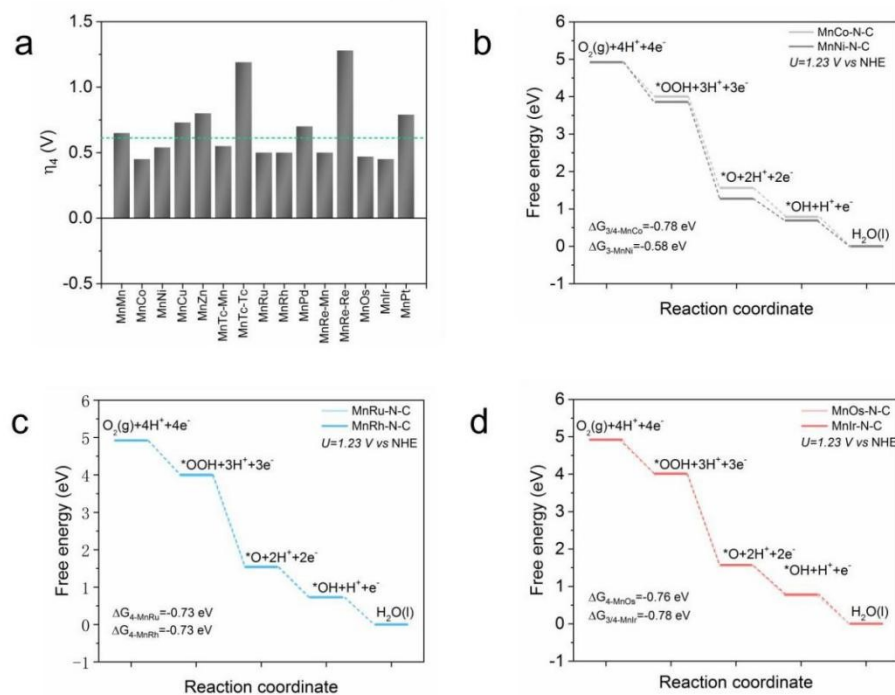

Figure S 7. (a) The overpotential of step  $^*\text{OH}+\text{H}^++\text{e}^-\rightarrow\text{H}_2\text{O}(\text{l})$  for MnM-N-C. The ORR free energy diagram of (b) MnM-N-C (M=Co, Ni), (c) MnM-N-C (M=Ru, Rh) and (d) MnM-N-C (M=Os, Ir).

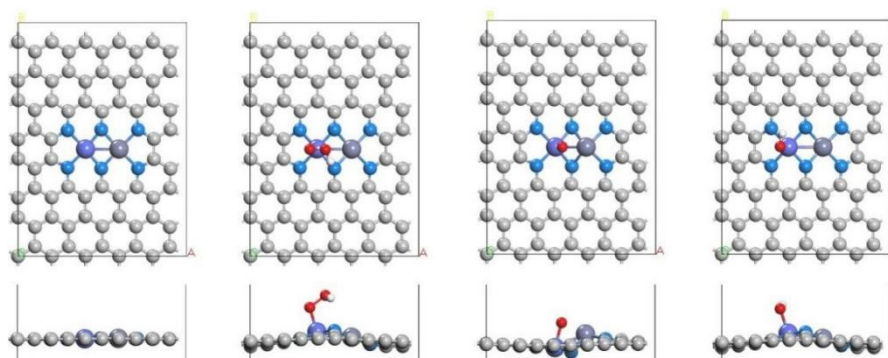

Figure S 8. The optimized structures Fe-N-C, \*OOH-Fe-N-C, \*O-Fe-N-C and \*OH-Fe-N-C. Gray: C; Purple: Fe; Blue: N; Red: O; Green: H.

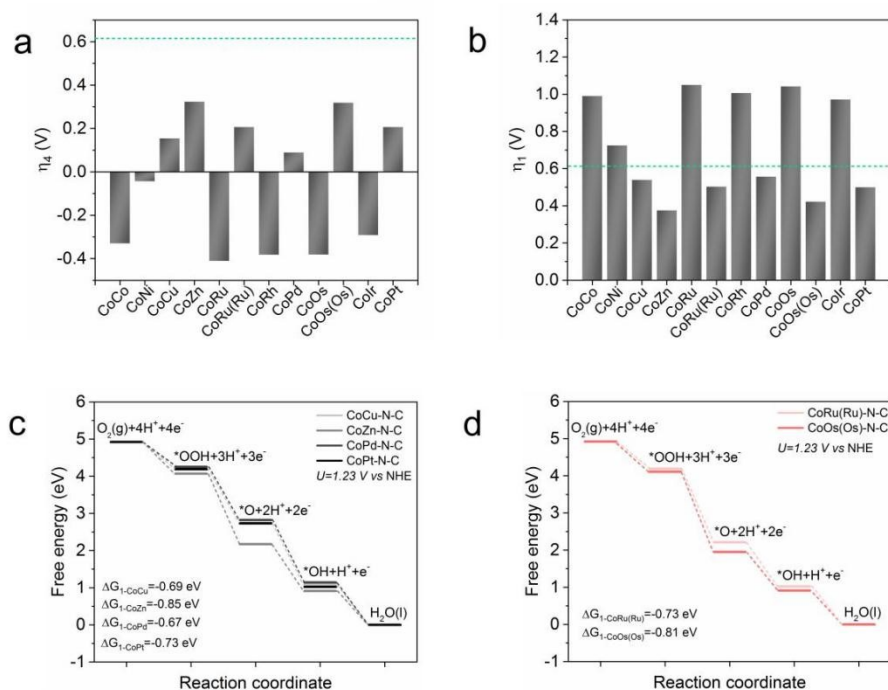

Figure S 9. The overpotential of (a) step  $*OH+H^++e^- \rightarrow H_2O(l)$  and (b) step  $O_2(g)+H^++e^- \rightarrow *OOH$  for CoM-N-C. The ORR free energy diagram of (c) CoM-N-C (M=Co, Zn, Pd, Pt), and (d) CoM-N-C (M=Ru, Os).

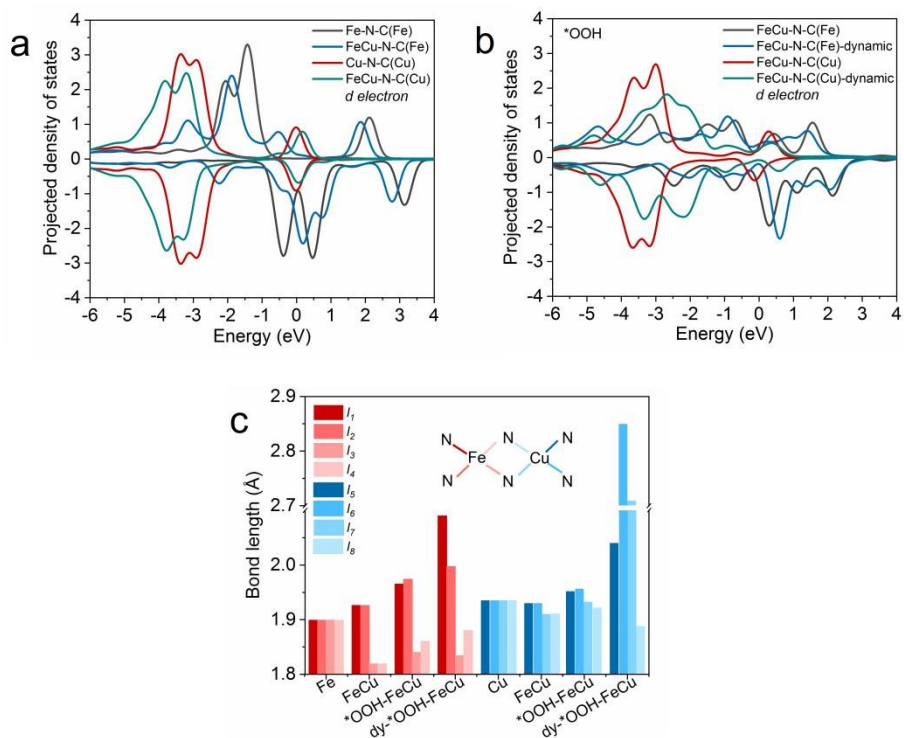

Figure S 10. The overpotential of (a) step  $*OH+H^++e^- \rightarrow H_2O(l)$  and (b) step  $O_2(g)+H^++e^- \rightarrow *OOH$  for CoM-N-C. The ORR free energy diagram of (c) CoM-N-C (M=Co, Zn, Pd, Pt), and (d) CoM-N-C (M=Ru, Os).

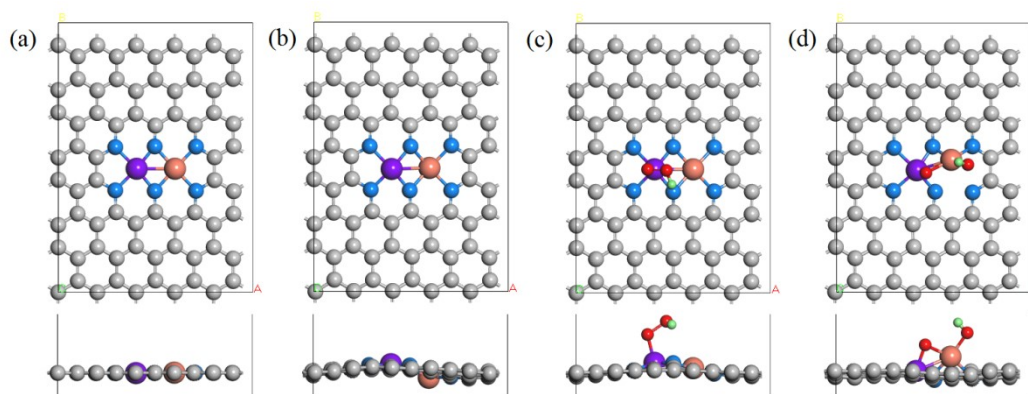

Figure S 11. The initial (a, c) and dynamic structure (b, d) of FeCu-N-C and \*OOH-FeCu-N-C, respectively.

Table S 1 The zero point energies and entropic corrections of oxygenates at 298.15 K

| Species          | ZPE(1) | TS(1) | ZPE(2) | TS(2) | ZPE(3) | TS(3) | ZPE* | TS*  |
|------------------|--------|-------|--------|-------|--------|-------|------|------|
| O*               | 0.05   | 0     | 0.084  | 0.05  | 0.05   | 0.05  | 0.09 | 0.05 |
| OH*              | 0.36   | 0.06  | 0.386  | 0.07  | 0.37   | 0.1   | 0.36 | 0.10 |
| OOH*             | 0.4    | 0.08  | 0.457  | 0.16  | 0.46   | 0.16  | 0.45 | 0.17 |
| O <sub>2</sub>   | 0.11   | 0.64  | -      | -     | -      | -     | -    | -    |
| H <sub>2</sub>   | 0.27   | 0.41  | 0.27   | 0.41  | 0.27   | 0.41  | 0.27 | 0.41 |
| H <sub>2</sub> O | 0.56   | 0.67  | 0.56   | 0.67  | 0.56   | 0.67  | 0.56 | 0.67 |

\*The present work.

Table S2 The ORR activity of M-N-C SACs

| M-N-C | $\Delta G_{\text{OH}}$<br>(eV) | $\eta_4$<br>(V) | $\Delta G_{\text{OOH}}$<br>(eV) | $\eta_1$<br>(V) | $\Delta G_{\text{O}}$<br>(eV) | $\eta_2$<br>(V) | $\eta_3$<br>(V) |
|-------|--------------------------------|-----------------|---------------------------------|-----------------|-------------------------------|-----------------|-----------------|
| Mn    | 0.54                           | 0.69            |                                 |                 |                               |                 |                 |
| Fe    | 0.62                           | 0.61            | 3.77                            | 0.08            | 1.41                          | -1.13           | 0.44            |
| Co    | 1.02                           | 0.21            | 4.16                            | 0.47            | 2.74                          | -0.18           | -0.49           |
| Ni    | 1.92                           | -0.69           | 5.01                            | 1.32            |                               |                 |                 |
| Cu    | 1.63                           | -0.40           | 4.84                            | 1.15            |                               |                 |                 |
| Zn    | 0.57                           | 0.66            |                                 |                 |                               |                 |                 |
| Tc    | -0.72                          | 1.95            |                                 |                 |                               |                 |                 |
| Ru    | 0.18                           | 1.05            |                                 |                 |                               |                 |                 |
| Rh    | 1.24                           | -0.01           | 4.39                            | 0.70            |                               |                 |                 |
| Pd    | 2.25                           | -1.02           | 5.27                            | 1.58            |                               |                 |                 |
| Ag    | 0.21                           | 1.02            |                                 |                 |                               |                 |                 |
| Cd    | -1.13                          | 2.36            |                                 |                 |                               |                 |                 |
| Re    | -1.22                          | 2.45            |                                 |                 |                               |                 |                 |
| Os    | -0.03                          | 1.26            |                                 |                 |                               |                 |                 |
| Ir    | 1.26                           | -0.03           | 4.41                            | 0.72            |                               |                 |                 |
| Pt    | 2.34                           | -1.11           | 5.32                            | 1.63            |                               |                 |                 |
| Au    | -0.44                          | 1.67            |                                 |                 |                               |                 |                 |
| Hg    | -2.31                          | 3.54            |                                 |                 |                               |                 |                 |

Table S3 The formation energy of FeM-N-C DACs and M-N-C SACs

|      | $\Delta E_{\text{f}}(\text{M}_1\text{M}_2\text{N}_6)$ | $\Delta E_{\text{f}}(\text{M}_1\text{N}_4)+\Delta E_{\text{f}}(\text{M}_2\text{N}_4)$ |
|------|-------------------------------------------------------|---------------------------------------------------------------------------------------|
| FeMn | -7.48                                                 | -6.16                                                                                 |
| FeFe | -7.98                                                 | -7.18                                                                                 |
| FeCo | -7.89                                                 | -7.37                                                                                 |
| FeNi | -6.92                                                 | -7.03                                                                                 |
| FeCu | -4.24                                                 | -4.62                                                                                 |
| FeZn | -2.56                                                 | -3.41                                                                                 |
| FeTc | -8.11                                                 | -5.70                                                                                 |

|      |       |       |
|------|-------|-------|
| FeRu | -7.96 | -6.20 |
| FeRh | -6.66 | -6.01 |
| FePd | -3.54 | -3.83 |
| FeRe | -7.63 | -4.87 |
| FeOs | -7.25 | -5.26 |
| FeIr | -5.50 | -4.80 |
| FePt | -2.24 | -2.46 |

Table S4 The adsorption energy of OH on different sites of  $M_1M_2$ -N-C DACs

|          | Mn site | M site | Bridge site |
|----------|---------|--------|-------------|
| MnMn-N-C | 0.29    | -      | Mn site     |
| MnCo-N-C | 0.49    | 1.38   | Mn site     |
| MnNi-N-C | 0.40    | 1.63   | Mn site     |
| MnCu-N-C | 0.22    | 1.39   | Mn site     |
| MnZn-N-C | 0.14    | -0.06  | 0.37        |
| MnTc-N-C | 0.39    | -0.25  | Tc site     |
| MnRu-N-C | 0.44    | 0.72   | Ru site     |
| MnRh-N-C | 0.44    | 1.44   | Mn site     |
| MnPd-N-C | 0.24    | 1.81   | Mn site     |
| MnRe-N-C | 0.44    | -0.34  | Re site     |
| MnOs-N-C | 0.48    | 0.69   | Mn site     |
| MnIr-N-C | 0.49    | 1.59   | Mn site     |
| MnPt-N-C | 0.15    | 1.60   | Mn site     |
|          | Fe site | M site | Bridge site |
| FeMn-N-C | 0.75    | 0.46   | Mn site     |
| FeFe-N-C | 0.84    | -      | Fe site     |
| FeCo-N-C | 0.78    | 1.32   | Fe site     |
| FeNi-N-C | 0.69    | 1.67   | Fe site     |
| FeCu-N-C | 0.60    | 1.47   | Fe site     |
| FeZn-N-C | 0.44    | 0.13   | 0.19        |
| FeTc-N-C | 0.82    | -0.11  | Tc site     |
| FeRu-N-C | 0.81    | 0.71   | Ru site     |
| FeRh-N-C | 0.72    | 1.50   | Fe site     |
| FePd-N-C | 0.51    | 1.80   | Fe site     |
| FeRe-N-C | 0.87    | -0.25  | Re site     |
| FeOs-N-C | 0.85    | 0.74   | Os site     |
| FeIr-N-C | 0.72    | 1.39   | Fe site     |
| FePt-N-C | 0.64    | 1.85   | Fe site     |



|          | Co site | M site | Bridge site |
|----------|---------|--------|-------------|
| CoCo-N-C | 1.27    | -      | Co site     |
| CoNi-N-C | 0.98    | 1.68   | Co site     |
| CoCu-N-C | 0.79    | 1.54   | Co site     |
| CoZn-N-C | 0.62    | 0.21   | 0.43        |
| CoRu-N-C | 1.35    | 0.73   | Ru site     |
| CoRh-N-C | 1.32    | 1.52   | Co site     |
| CoPd-N-C | 0.85    | 1.77   | Co site     |
| CoOs-N-C | 1.32    | 0.62   | Os site     |
| CoIr-N-C | 1.23    | 1.41   | Co site     |
| CoPt-N-C | 0.73    | 1.64   | Co site     |

Table S5 The geometric and electronic property of FeM-N-C DACs

| TM-N-C             | Charge (Fe) | Spin (Fe) | $I_{\text{Fe-N}}$  | $I_{\text{Fe-TM}}$ |
|--------------------|-------------|-----------|--------------------|--------------------|
| Fe                 | 0.536       | 2.042     | 1.899*4            | -                  |
| FeMn               | 0.439       | 0.670     | 1.808*2<br>1.939*2 | 2.261              |
| FeFe               | 0.498       | 1.144     | 1.799*2<br>1.953*2 | 2.238              |
| FeCo               | 0.562       | 1.570     | 1.798*2<br>1.952*2 | 2.280              |
| FeNi               | 0.551       | 1.940     | 1.807*2<br>1.931*2 | 2.409              |
| FeCu               | 0.538       | 2.114     | 1.819*2<br>1.926*2 | 2.432              |
| FeZn               | 0.499       | 2.038     | 1.825*2<br>1.918*2 | 2.436              |
| FeTc <sup>OH</sup> | 0.484       | 1.446     | 1.863*2<br>1.936*2 | 2.352              |
| FeRu               | 0.525       | 1.525     | 1.852*2<br>1.931*2 | 2.297              |
| FeRh               | 0.486       | 1.581     | 1.827*2<br>1.931*2 | 2.326              |
| FePd               | 0.563       | 1.846     | 1.822*2<br>1.915*2 | 2.430              |
| FeRe <sup>OH</sup> | 0.472       | 1.439     | 1.877*2<br>1.935*2 | 2.379              |
| FeOs               | 0.517       | 1.536     | 1.877*2<br>1.935*2 | 2.333              |
| FeIr               | 0.573       | 1.630     | 1.858*2<br>1.940*2 | 2.369              |
| FePt               | 0.605       | 2.020     | 1.875*2            | 2.510              |

|  |  |  |         |  |
|--|--|--|---------|--|
|  |  |  | 1.930*2 |  |
|--|--|--|---------|--|

## References

1. S. Zhou, N. S. Liu, Z. Y. Wang, J. J. Zhao, Nitrogen-Doped Graphene on Transition Metal Substrates as Efficient Bifunctional Catalysts for Oxygen Reduction and Oxygen Evolution Reactions. *Acs Applied Materials & Interfaces* **9**, 22578-22587 (2017).
2. L. Yu, X. L. Pan, X. M. Cao, P. Hu, X. H. Bao, Oxygen reduction reaction mechanism on nitrogen-doped graphene: A density functional theory study. *Journal of Catalysis* **282**, 183-190 (2011).
3. X. M. Zhang *et al.*, Theoretical study of the strain effect on the oxygen reduction reaction activity and stability of FeNC catalyst. *New Journal of Chemistry* **44**, 6818-6824 (2020).
